# Supplementary material for: Acetaldehyde-modified-cystine functionalized Zr-MOFs for pH/GSH dual-responsive drug delivery and selective visualization of GSH in living cells
Source: Royal Society of Chemistry journal article supplement (doi:10.1039/c9ra05741b), 2020-01-01
Supplement: c9ra05741b1.pdf [file c9ra05741b1.pdf]

## Supporting Information

# Acetaldehyde-modified cystine modified Zr-MOFs for pH/GSH dual-responsive drug delivery and visualize GSH in living cells

Caixue Lin<sup>†, //</sup>, Hailu He<sup>†, //</sup>, Yongqi Zhang<sup>†</sup>, Mingyue Xu<sup>†</sup>, Feng Tian<sup>†</sup>,  
Ling Li<sup>†, \*</sup>, Yingxi Wang<sup>†, \*</sup>

<sup>†</sup> Ministry-of-Education Key Laboratory for the Synthesis and Application of Organic  
Function Molecules, Hubei University 430062, People's Republic of China

<sup>\*</sup> Hubei Collaborative Innovation Center for Advanced Organic Chemical Materials,  
Hubei University 430062, People's Republic of China

// : These authors contributed equally to this work.

\* Corresponding author: Ling Li, [lingli@hubu.edu.cn](mailto:lingli@hubu.edu.cn);

Yingxi Wang, [16890202@qq.com](mailto:16890202@qq.com)

## Contents

|                                             |     |
|---------------------------------------------|-----|
| Chemicals and Reagents                      | S-3 |
| Characterization Methods                    | S-3 |
| Size distributions of Zr-MOF and Zr-MOF/AMC | S-4 |

### **Chemicals and Reagents**

Acetaldehyde, cystine, HCl (36.0-38.0%), 2-amino-terephthalic acid, N,N-dimethylformamide, Methotrexate (MTX), glutathione, N-hydroxysuccinimide, N-methylmaleimide, 1-ethyl-3-(3-dimethyl-aminopropyl) carbodiimide were purchased from Aladdin Industrial Corporation. Zirconium chloride, 2-aminoterephthalic acid, acetic acid, sodium hydroxide were purchased from Sinopharm (Shanghai) Chemical Reagent Co., Ltd., China. All other chemicals used in this work were of analytical grade, obtained from commercial suppliers, and used without further purification unless otherwise noted. Fresh double-distilled water was used in all experiments.

### **Characterization Methods**

Powder X-ray diffractometry (XRD) patterns were obtained using a D8 Advance X-ray diffractometer (Bruker Company, Germany). Fourier Transform Infra-Red (FT-IR) spectra were obtained using a Spectrum One FT-IR spectrophotometer (Perkin-Elmer, USA) at room temperature. Transmission electron microscopy (TEM) images were obtained on a Tecnai G20 microscope (FEI, America). Morphologies of the samples were observed on a JSM6510LV scanning electron microscope (SEM, JEOL, Japan). The fluorescence measurements were recorded on LS55 fluorescence spectrometer (Perkin Elmer, America).

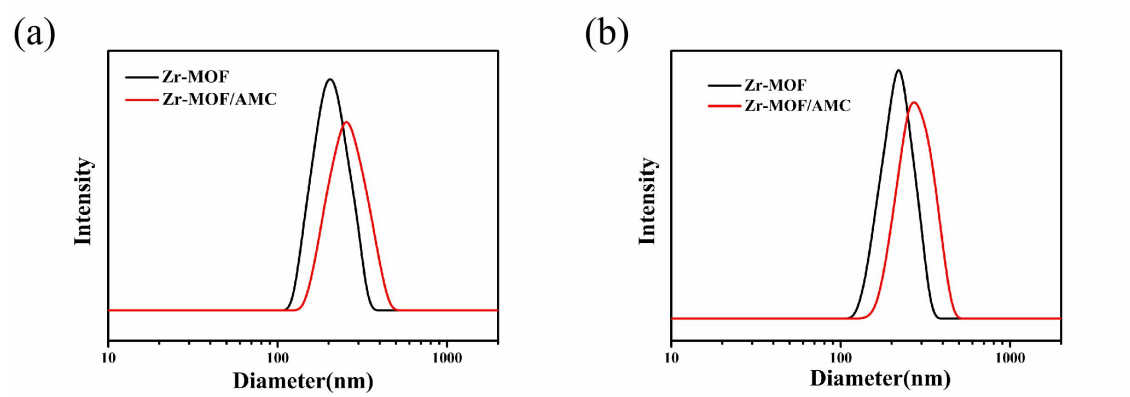

Fig.S1 Size distributions of Zr-MOF and Zr-MOF/AMC nanoparticles at pH=7.4 (a) and pH=5.8 (b) determined by DLS
